# Supplementary material for: Lactobacillus maintains healthy gut mucosa by producing L-Ornithine
Source: PubMed Central journal article supplement (PMC6506532; doi:10.1038/s42003-019-0424-4), 2019-05-08
Supplement: 42003_2019_424_MOESM2_ESM.pdf [file 42003_2019_424_MOESM2_ESM.pdf]

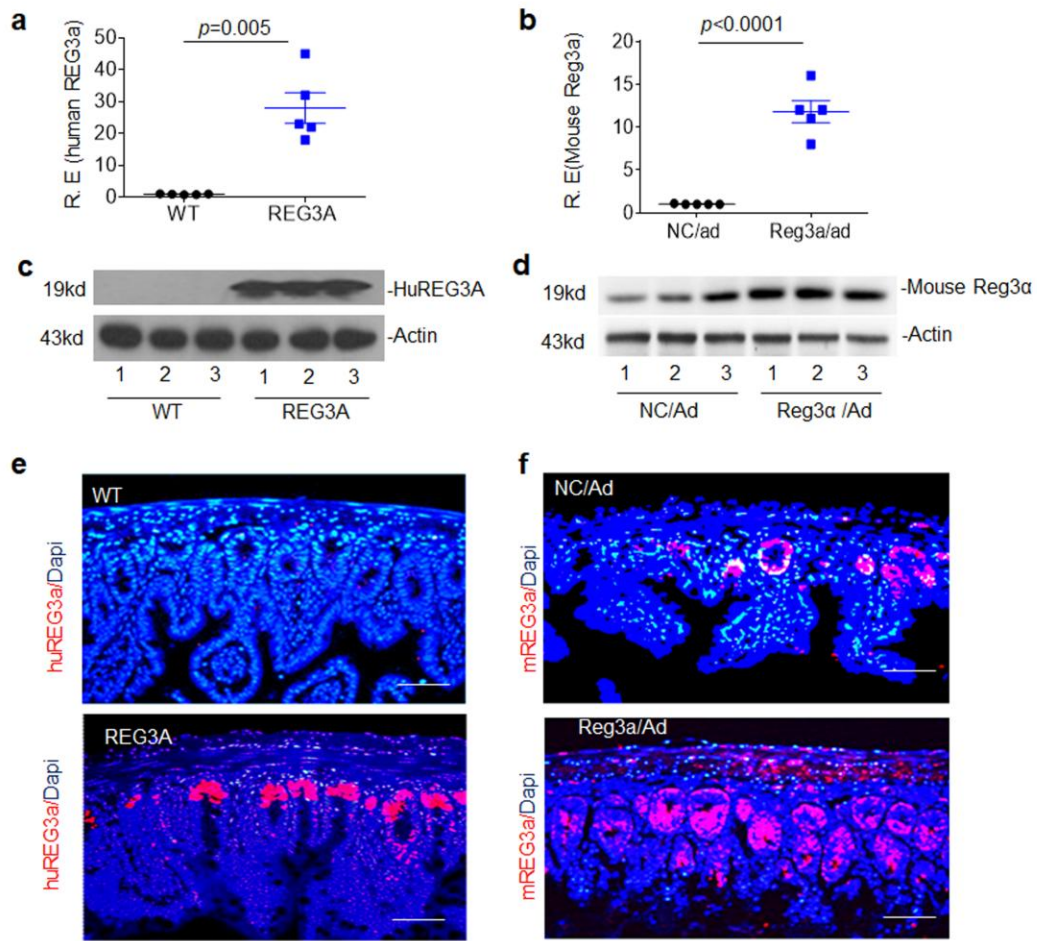

**Supplementary Fig. 1. Expression of REG3α in human *REG3A*<sup>tg</sup> mice or Reg3α/adenovirus injected mice. a**, QRT-PCR of human REG3α in the ileum tissues from 6-8 week old male *wt* and human *REG3A*<sup>tg</sup> mice. **b**, QRT-PCR of mouse Reg3α in the ileum tissues from mice after ip injecting Reg3α/adenovirus (Reg3α/Ad,  $1 \times 10^9$  viral particles/mouse) or control viral particles (NC/Ad,  $1 \times 10^9$  control viral particles/mouse) for two weeks. **c**, Immunoblot of human REG3α of ileum tissues from *wt* and human *REG3A*<sup>tg</sup> mice. **d**, Immunoblot of mouse Reg3α of the ileum tissues from mice with (Reg3α/Ad) or without (NC/Ad) Reg3α adenovirus injection. NC/Ad, empty adenovirus offered by company. **e**, Immunofluorescent staining of the ileum tissues from *wt* and human *REG3A*<sup>tg</sup> mice. **f**, Immunofluorescent staining of the ileum tissues from the mice with or without Reg3α adenovirus. Anti-human REG3α antibody was used in *wt* and human *REG3A*<sup>tg</sup> mice; whereas anti-mouse Reg3α antibody was used in the mice with (Reg3α/Ad) or without (NC/Ad) Reg3α/adenovirus injection. Scale bars=40 μm; Student's *t*-test in a and b, mean  $\pm$ SD; NS, no significance; R. E., relative expression; Number in c and d indicates different individuals.

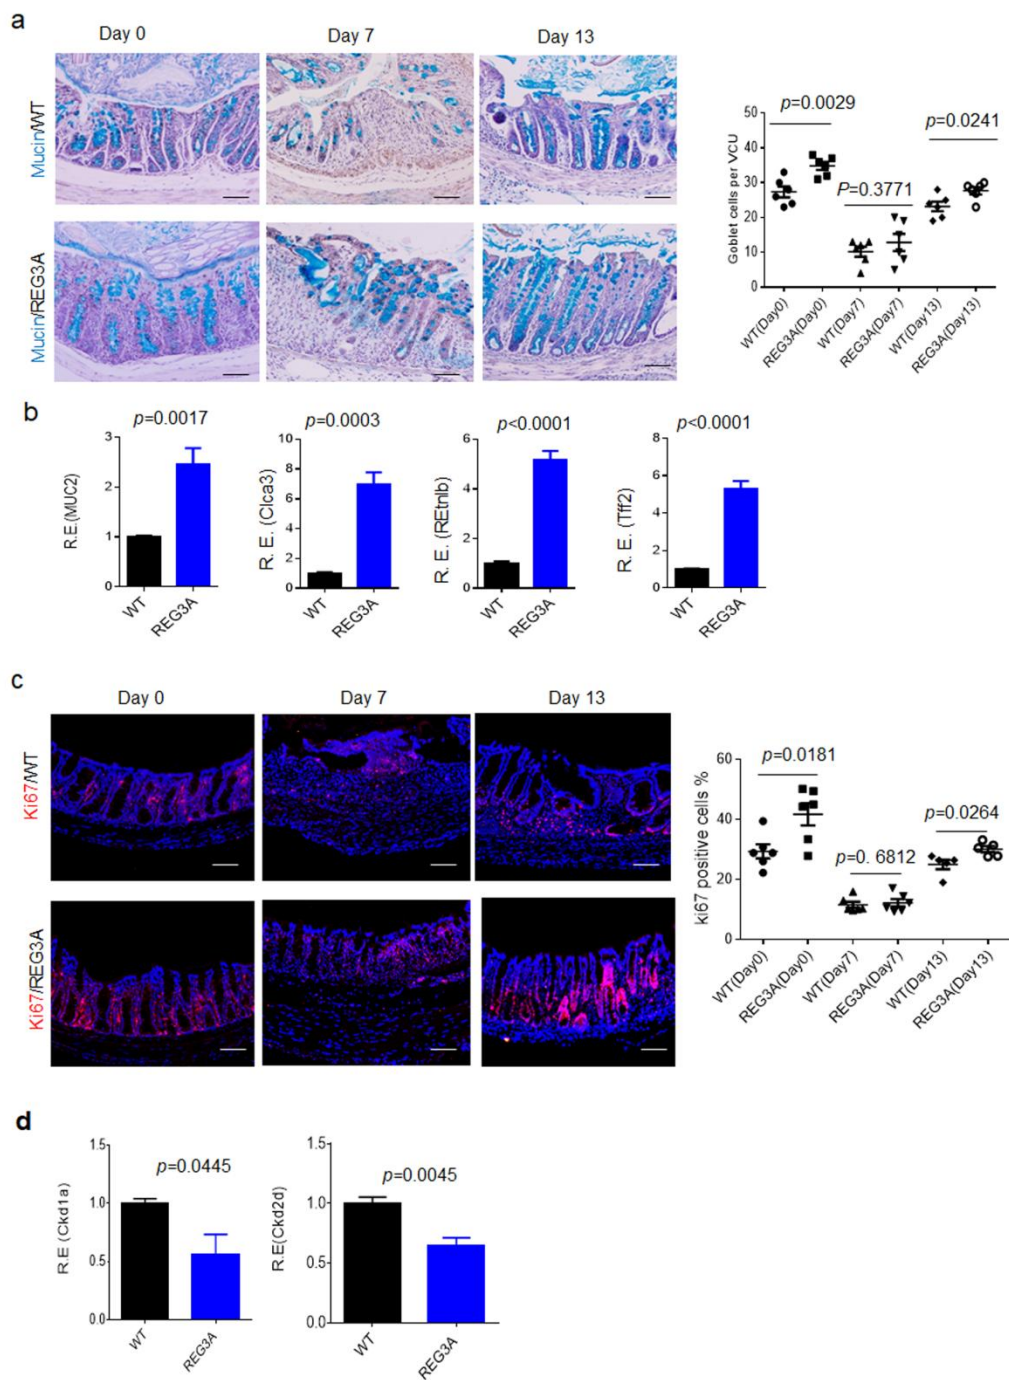

**Supplementary Fig. 2. The mucus layer and proliferative index in the distal colons of REG3A transgenic mice.** **a**, Staining of mucin in the proximal colon of human *REG3A*<sup>tg</sup> mice (REG3A) and control cohoused littermate *wt* mice at the indicated time (ten slides/mouse; n=6); VCU, villus-crypt units. **b**, QRT-PCR of mucin 2 (MUC2), *Clca3*, *Retnlb* and *Tff2* in the colonic epithelial cells of human

*REG3A*<sup>tg</sup> and control cohoused littermate *wt* mice at day 13 (n=6); **c**, Staining of Ki67 cells in the colon (ten slides/mouse, n=6); The regions of interest were analyzed using ImageJ software, and detection of positive staining and cell number was performed with ImageJ software; **d**, QRT-PCR of *Cdkn1a* and *Cdkn2d* (n=6) in the colonic epithelial cells of human *REG3A*<sup>tg</sup> and control cohoused littermate *wt* mice at day 13 (n=6). These mice were treated using 2.5% DSS for 7 days from day 0, and then switched to regular drinking water. Scale bars=40  $\mu$ m; Student's *t*-test in b and d; ANOVA plus post-Bonferroni analysis in a and c; mean  $\pm$ SEM in a and c; NS, no significance; R. E, relative expression. Data are a representative of at least three independent experiments.

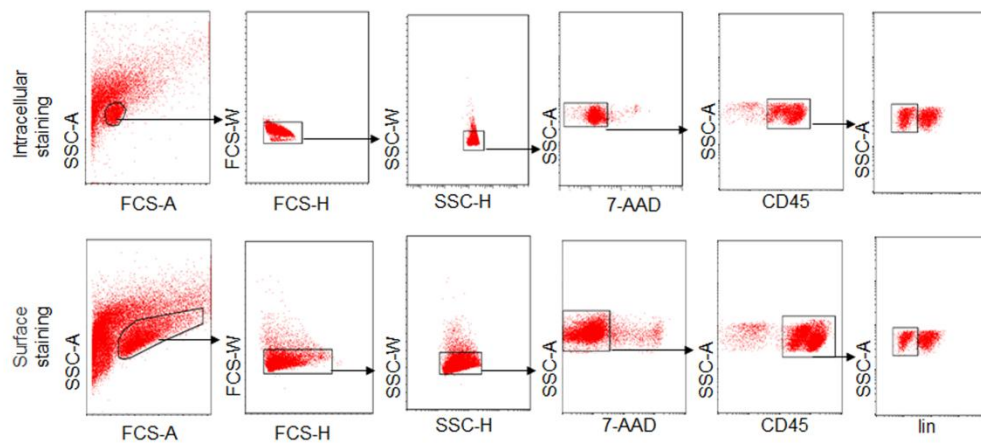

**Supplementary Fig. 3. Representative FACS gating scheme for immune cell analyses in lamina propria (LP) tissues.** After eliminating double cells by FCS-W and SSC-W, and dead cells by 7-AAD, we gated on lineage-negative cells for further analyses following initial gating on live CD45(+) cells.

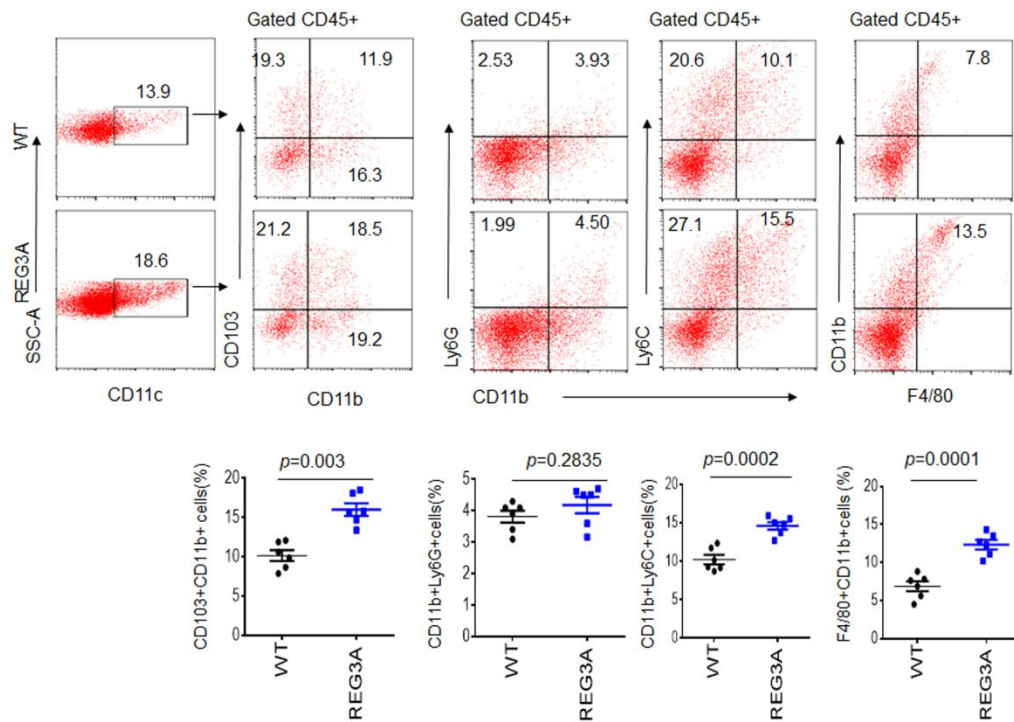

**Supplementary Fig. 4. Immune cell populations in *REG3A*<sup>tg</sup> mice.** Flow cytometry of CD11c(+) cells, CD11b(+)Ly6G(+), CD11b(+)Ly6C(+), F4/80(+)CD11b(+) and their subsets in the LP of ileum. Student's *t*-test was performed to compare the proportion of CD103(+)CD11b(+) , CD11b(+)Ly6G(+), CD11b(+)Ly6C(+), F4/80(+)CD11b(+) cells in *wt* and human *REG3A*<sup>tg</sup> (*REG3A*) mice (Mean  $\pm$ SD, n=6). Numbers indicate the cellular proportion. Data are a representative of at least three independent experiments.

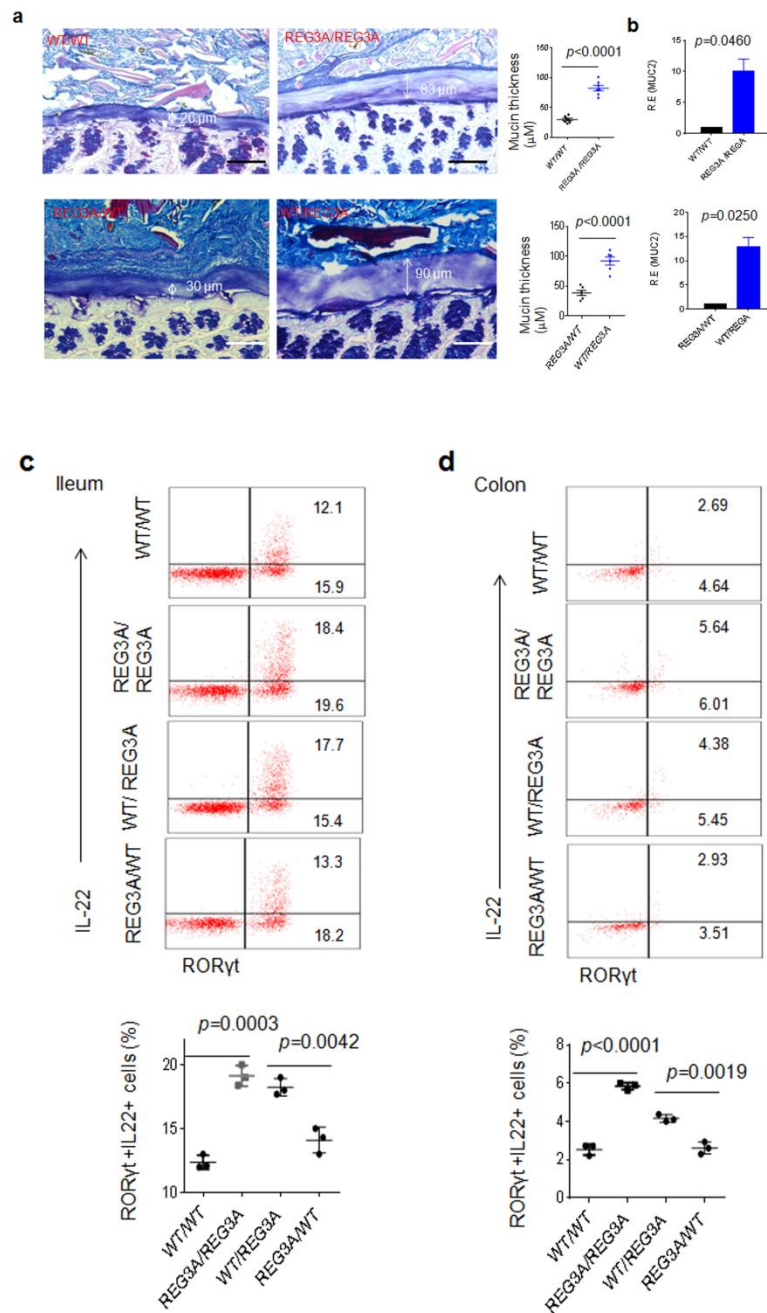

**Supplementary Fig. 5. The transplantation of REG3A-shaped microbiota causes increased proportion of RORγt (+) IL-22(+) cells in small intestine and colon tissue. a**, Mucus staining of colon tissues in WT/WT, REG3A/REG3A, WT/REG3A and REG3A/WT mice. **b**, QRT-PCR of MUC gene in the ileum and colon tissues of WT/WT, REG3A/REG3A, WT/REG3A and REG3A/WT mice; **c**, Flow cytometry of RORγt (+) IL-22(+) cells in the ileum and colon tissues of WT/WT, REG3A/REG3A, WT/REG3A and REG3A/WT mice. WT/WT, the feces of WT mice were transplanted

into pan-antibiotics treated mice; REG3A/REG3A, the feces of REG3A tg mice were transplanted into pan-antibiotics treated REG3A tg mice; WT/REG3A, the feces of REG3A tg mice were transplanted into pan-antibiotics treated WT mice; REG3A/WT, the feces of WT mice were transplanted into pan-antibiotics treated REG3A tg mice. Scale bars=40  $\mu$ m. Student's *t*-test in a and b, ANOVA plus post-Bonferroni analysis in c and d. NS, no significance; R. E, relative expression.

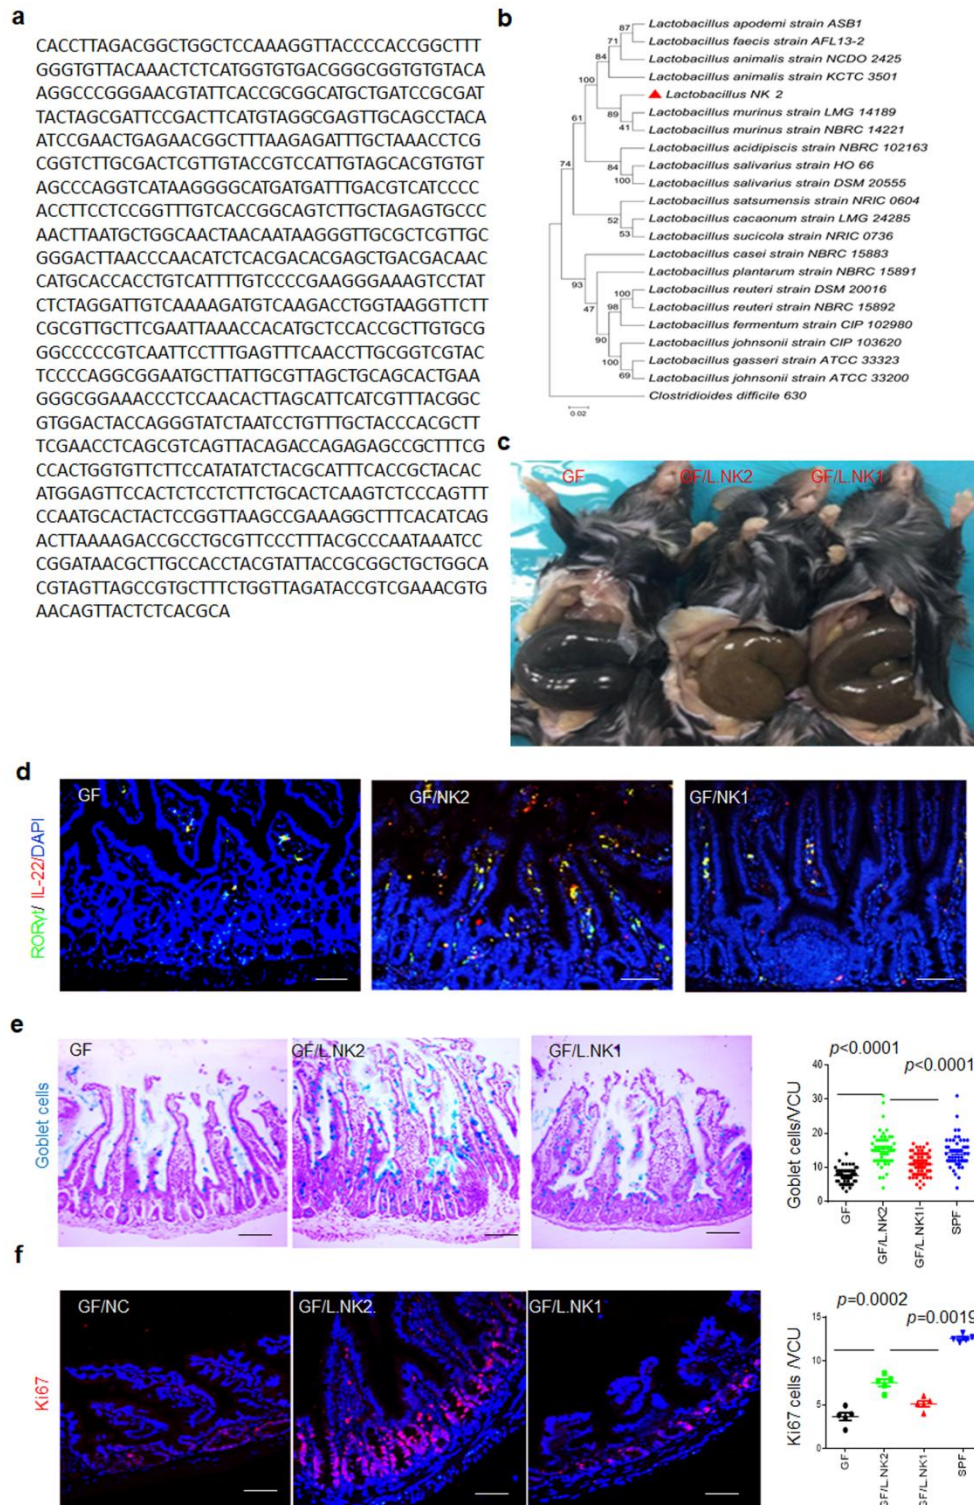

Supplementary Fig. 6. *Lactobacillus* promotes gut mucus layer formation in germ-free mice. **a**, Sequence of REG3A associated *lactobacillus*, which is named as

*Lactobacillus NK.2(L.NK2)*. The 16s rRNAs from *lactobacillus* were extracted and sequenced by primers (F: 5'-AGAGTTTGATCATGGCTCAG-3'; R: 5'-TAGGGTTACCTTGTTACGACTT-3'). Fresh fecal samples were collected and diluted in 2 ml PBS solution, and cultured on Rogosa SL selective medium (Sigma-Aldrich) for *lactobacillus* enumeration, and then colonies were identified and purified using 16s rRNA sequence analyses. **b**, Homology of isolated *L. NK2* strain with other *lactobacilli*. The gut *lactobacillus* was selected and cultured in *lactobacillus* selected medium (Barebio, China). Phylogenetic tree shows the relationships among 16S rRNA sequences of *L. NK2* strain, including *lactobacillus* and species representing different lineages within genus *lactobacillus*. **c**, The representative caecum in germ-free (GF) mice with or without *L. NK2* or *L. NK1* colonization (n=5, male). **d**, Immunostaining of ROR $\gamma$ t (+)IL-22(+) cells in the ileum of GF mice with or without *L.NK2* or *L.NK1* colonization. Representative images (n=6). **e**, Staining of goblet cells in the ileum of GF mice with or without *L.NK2* or *L.NK1* colonization. Ten slides/mouse, n=6. **f**, Staining of the Ki67 cells in the ileum of GF mice with or without *L.NK2* or *L.NK1* colonization. Ten slides/mouse, n=6. Scale bars=40  $\mu$ m. ANOVA plus post-Bonferroni analysis in e and f; NS, no significance; R. E, relative expression.



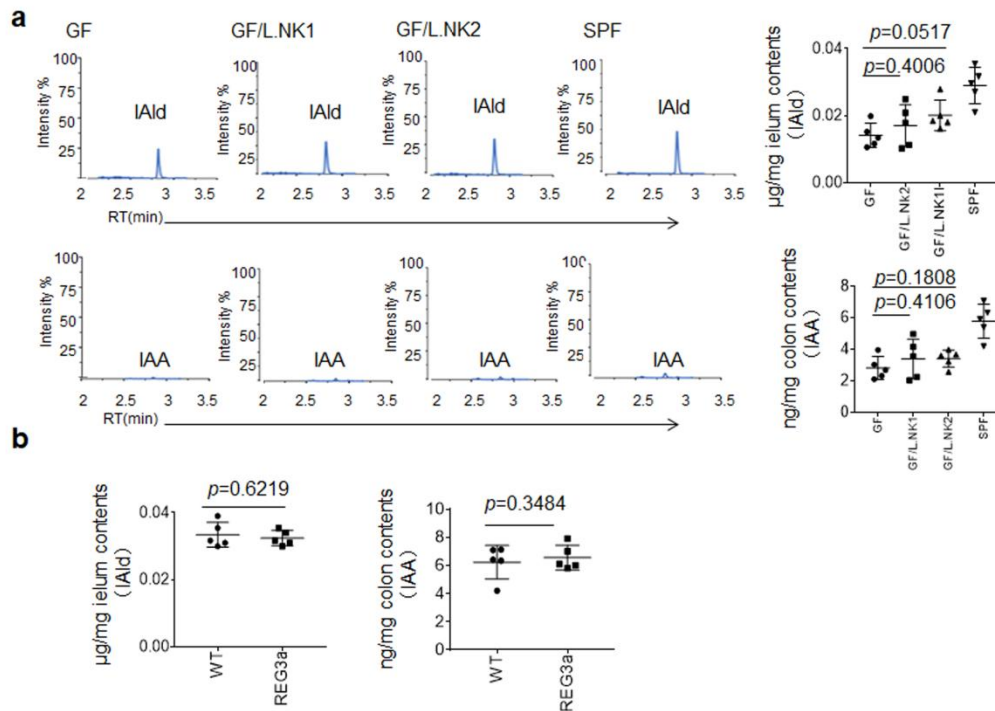

**Supplementary Fig. 7. *L. NK2* colonization does not change the levels of IAld and IAA in the ileum and colon of GF mice. a, HPLC/MASS of IAld in the ileum and colon contents of GF mice with or without *L. NK2* or *L. NK1* colonization (n=5). b, HPLC/MASS of IAA in the ileum and colon contents of wt and *human REG3A*<sup>tg</sup> (REG3a) mice (n=5). ANOVA plus post-Bonferroni analysis in a; Student's *t*-test in b, mean  $\pm$ SD. Data are a representative of three independent experiments.**

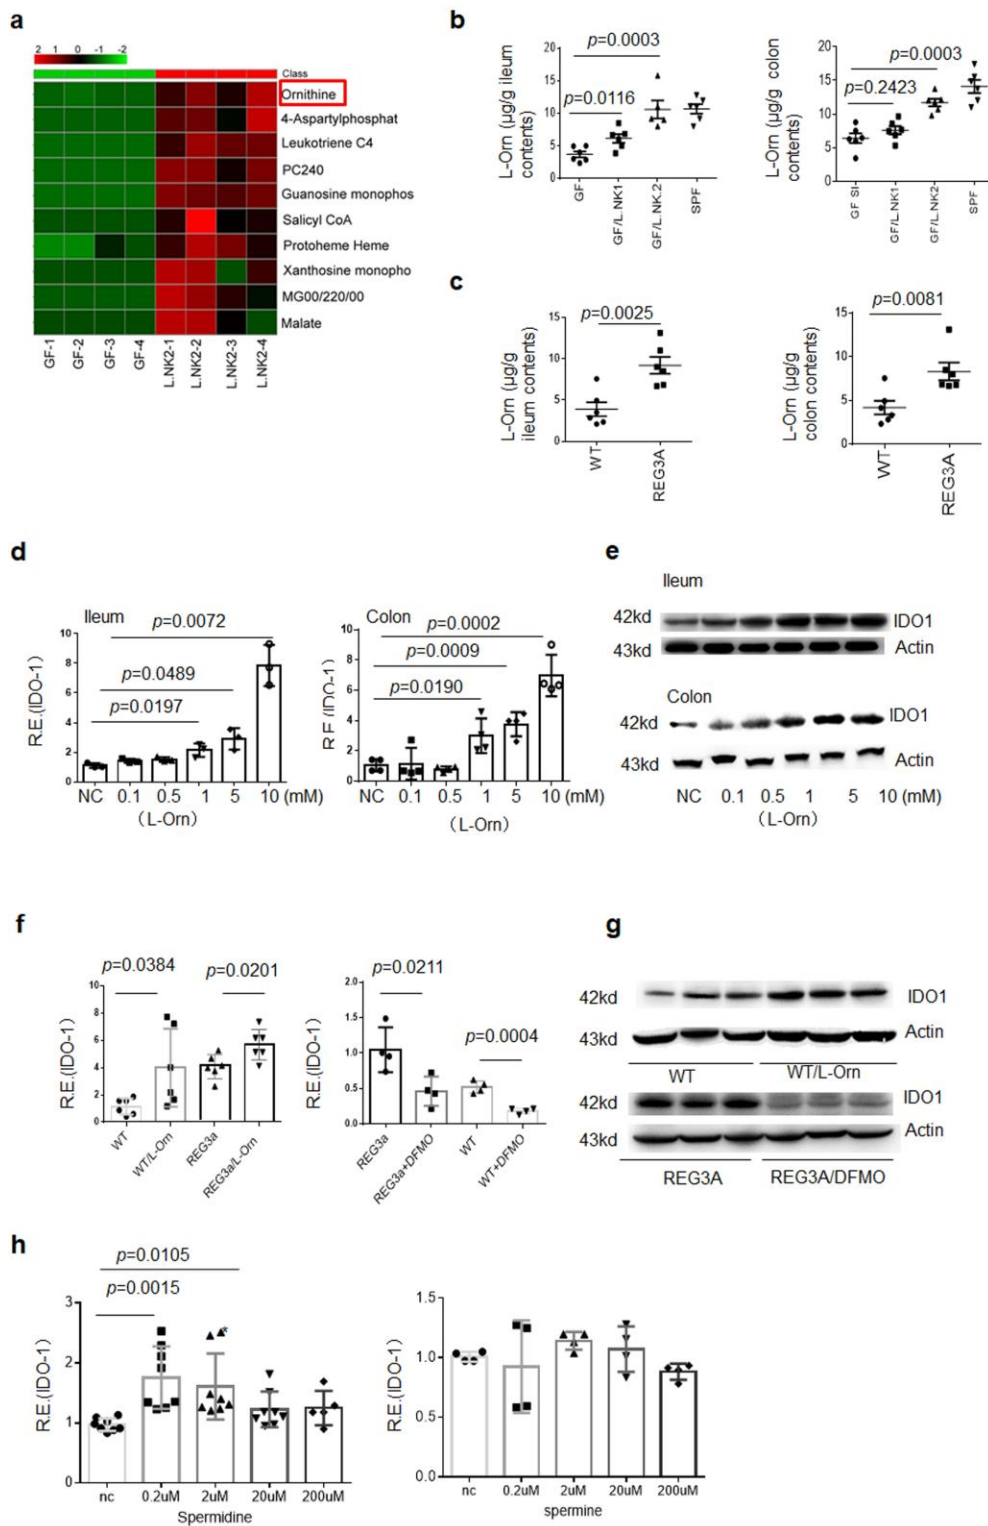

**Supplementary Fig. 8. Gut tryptophan metabolism depends on L-Orn. a,** HPLC/MASS of the gut contents in REG3 $\langle$  associated *lactobacillus* colonized GF mice. GF-1, GF-2, GF-3 and GF-4 indicated different GF individuals; L.NK2-1, L.NK2-2, L.NK2-3 and L.NK2-4 indicated different GF individuals infused by L. NK2 ( $1 \cdot 10^9$ /mouse). **b,** L-Orn analyses in the ileum and colon contents in REG3 $\langle$  associated *lactobacillus* ( L. NK2 ) colonized GF mice. GF, germ free mice; GF/L.NK1, control *lactobacillus* infused GF mice; GF/L.NK2, REG3 $\langle$  associated *lactobacillus* infused mice; SPF, wt mice raised in specific pathogen-free environment. **c,** L-Orn analyses in the contents of the ileum and colon of *human REG3A<sup>tg</sup>* and their control littermate wt mice. **d** and **e,** QRT-PCR (d) and immunoblotting (e) of IDO1 in the ileum and colon epithelial cells after exposed to L-Orn. Isolated fresh ileum or colon were stimulated using different concentrations of L-Orn. IDO1 expression was analyzed after 12 hrs. **f** and **g,** QRT-PCR (f) and immunoblotting (g) of IDO1 in the ileum epithelial cells after L-Orn or L-Orn inhibitor DFMO (DFMO) administration. L-Ornithine and eflornithine monohydrochloride (DFMO) were dissolved in fresh water. The mean L-Orn consumption of mice was  $\sim 3.3$  g/kg/d for 14 days; The mean DFMO consumption of mice was  $\sim 1.5$  g/kg/d for 14 days. WT, wild type mice; WT/Orn, L-Orn fed wt mice; REG3A, human *REG3A<sup>tg</sup>* mice; REG3A/DFMO, L-Orn inhibitor DFMO fed human *REG3A<sup>tg</sup>* mice. Mice fed with H<sub>2</sub>O without L-Orn and DFMO were used as control. **h,** QRT-PCR of IDO1 in the ileum and colon epithelial cells after exposed to L-Orn. Isolated fresh ileum or colon were stimulated using different concentrations of spermidine and spermine. IDO1 expression was analyzed after 12 hrs. Student's *t*-test, mean  $\pm$ SD in c ; ANOVA plus post-Bonferroni analysis in b, d, f and h. NS, no significance; R. E, relative expression. Data in per panel are a representative of at least three independent experiments.

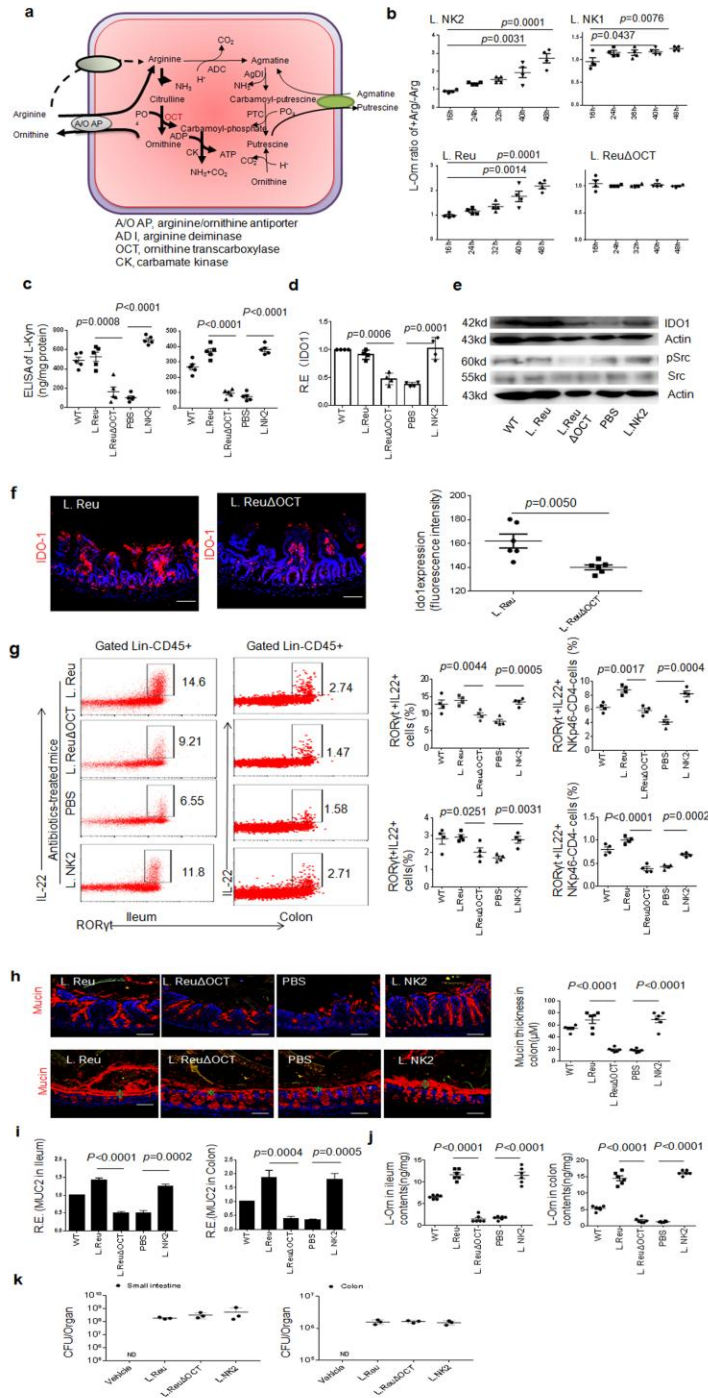

**Supplementary Fig. 9. OCT deficiency impedes the role of lactobacillus. a**, Map of arginine metabolism in lactobacillus. **b**, L-Orn analyses in the supernatants of different lactobacillus strain (L. NK2, L. NK1, L. Reuteri (L. Reu) and L. Reuteri/ΔOCT (L. ReuΔOCT) with and without arginine. The ratio of L-Orn with and without arginine was compared between 16 h and other time points. **c**, L-Kyn ELISA in the ileum and colon of mice. **d** and **e**, QRT-PCR (**d**) and immunoblotting (**e**) of IDO1 in the ileum epithelial cells of mice. **f**, Immunostaining of IDO1 in the ileum of

mice. **g**, Flow cytometry of CD45<sup>+</sup>ROR $\gamma$ t<sup>+</sup> IL-22<sup>+</sup> cells and their subsets in the LP of ileum and colon of mice. **h**, Immunostaining of mucin in the ileum (upper) and colon (lower) of mice. **i**, QRT-PCR of mucin2 (Muc2) in the ileum (left) and colon (right) of mice. **j**, L-Orn analyses in the ileum (left) and colon (right) contents of mice. **k**, Clone forming units (CFU) of small intestine and colon in mice.

In **c-k**, L. Reuteri, L. Reuteri/ $\Delta$ OCT, BPS and L. NK2 were respectively infused into antibiotics-treated mice for 7 days ( $1 \cdot 10^9$  CFU/mouse); PBS, only PBS; WT, untreated control. Scale bars=40  $\mu$ m; ANOVA plus post-Bonferroni analysis in b, c, d, g, h, i and j; Student's *t*-test, mean  $\pm$ SD in f and k. NS, no significance; R. E, relative expression. Data are a representative of at least three independent experiments.

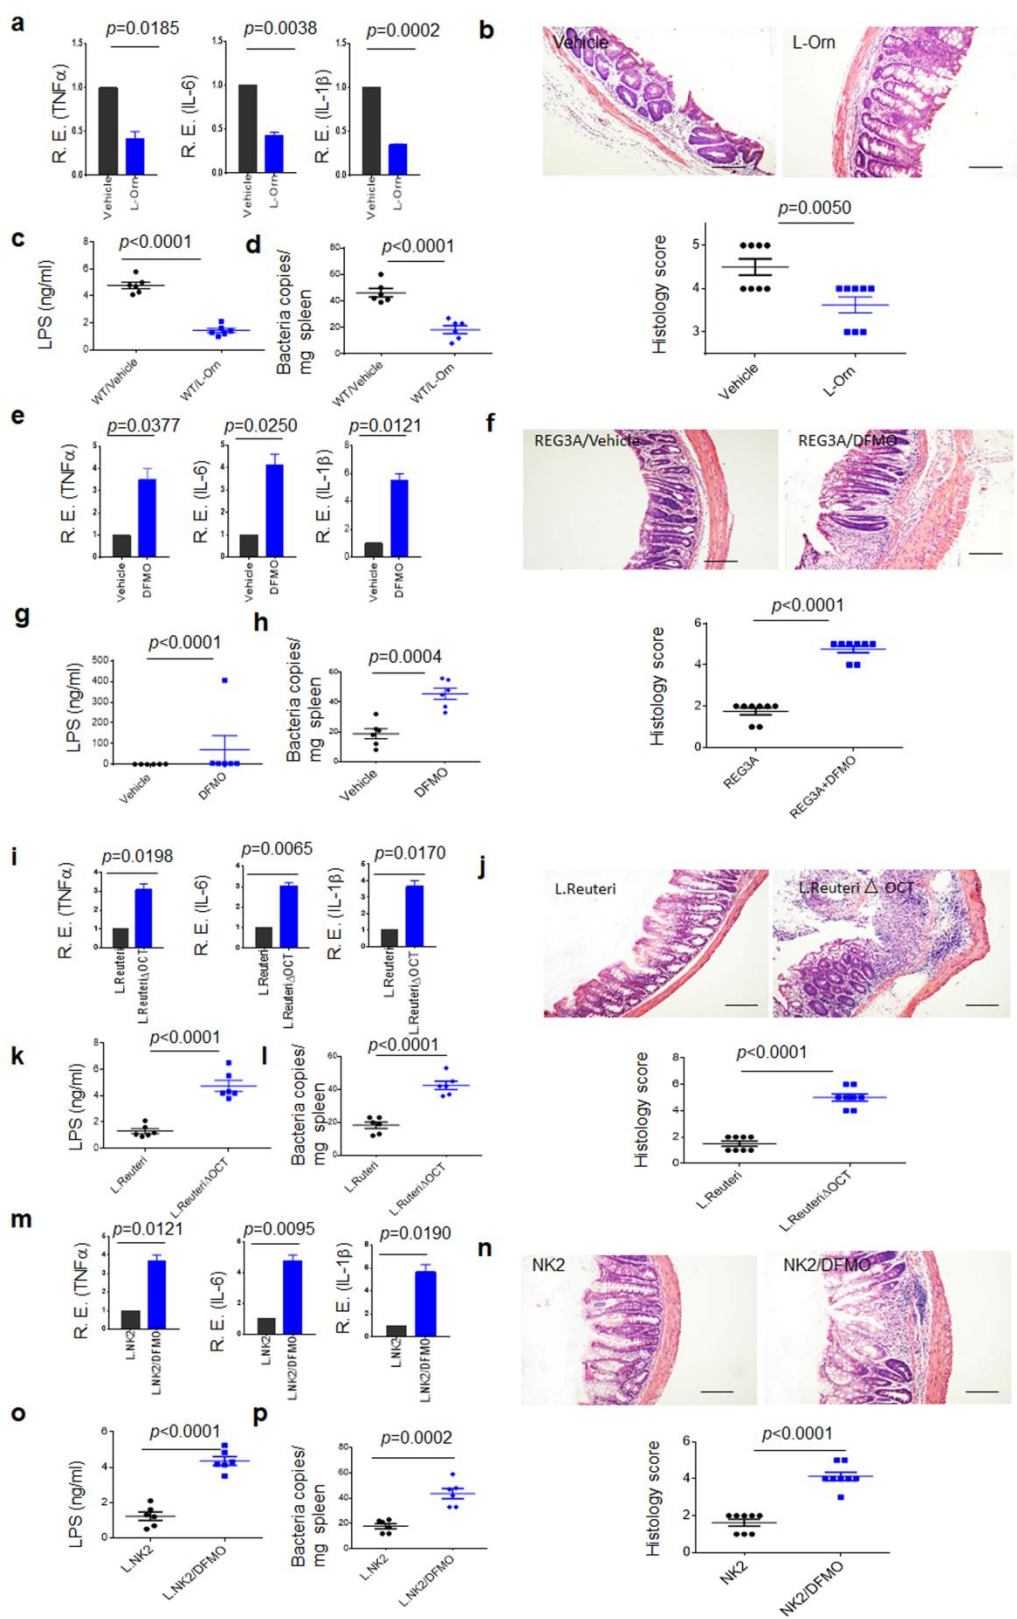

**Supplementary Fig. 10. L-Orn promotes resistance to DSS mediated colitis. a, e, i and m,** QRT-PCR of TNF $\alpha$ , IL-6 and IL1 $\beta$  in the colon tissues of *wt* mice with (L-Orn) or without (Vehicle) administration of L-Orn (n=6, male, a), *REG3A<sup>tg</sup>* mice with (REG3A/DFMO) or without (REG3A/Vehicle) administration of DFMO (n=6, male, e), mice after infusing *L. Reuteri* or *L. Reuteri/ΔOCT* mice (n=6, male, i) and mice after infusing *L. NK2* or *L. NK2 with DFMO* mice (n=6, male, m). **b, f, j and n,** Hematoxylin/eosin staining and histological scores of distal colon samples in *wt* mice with (L-Orn) or without (Vehicle) administration of L-Orn (n=8, male, b), human *REG3A<sup>tg</sup>* mice with (REG3a/DFMO) or without (REG3a/Vehicle) administration of DFMO (n=8, male, f), mice after infusing *L. Reuteri* or *L. Reuteri/ΔOCT* mice (n=8, male, j) and mice after infusing *L. NK2* or *L. NK2 with DFMO* (n=8, male, n). **c, g, k and o,** LPS in the peripheral sera of *wt* mice with (L-Orn) or without (Vehicle) administration of L-Orn (n=6, male, c), human *REG3A<sup>tg</sup>* mice with (REG3A/DFMO) or without (REG3A/Vehicle) administration of DFMO (n=6, male, g), mice after infusing *L. Reuteri* or *L. Reuteri/ΔOCT* mice (n=6, male, k) and mice after infusing *L. NK2* or *L. NK2 with DFMO* mice (n=6, male, o). **d, h, l and p,** Bacterium numbers in the spleen in *wt* mice with (L-Orn) or without (Vehicle) administration of L-Orn (n=6, male, d), human *REG3A<sup>tg</sup>* mice with (REG3A/DFMO) or without (REG3A/Vehicle) administration of DFMO (n=6, male, h), mice after infusing *L. Reuteri* or *L. Reuteri/ΔOCT* mice (n=6, male, l) and mice after infusing *L. NK2* or *L. NK2 with DFMO* (n=6, male, p). Scale bars=40  $\mu$ m. Student's t-test, mean  $\pm$ SD; NS, no significance; R. E., relative expression. Data are a representative of three independent experiments.

Figure 4

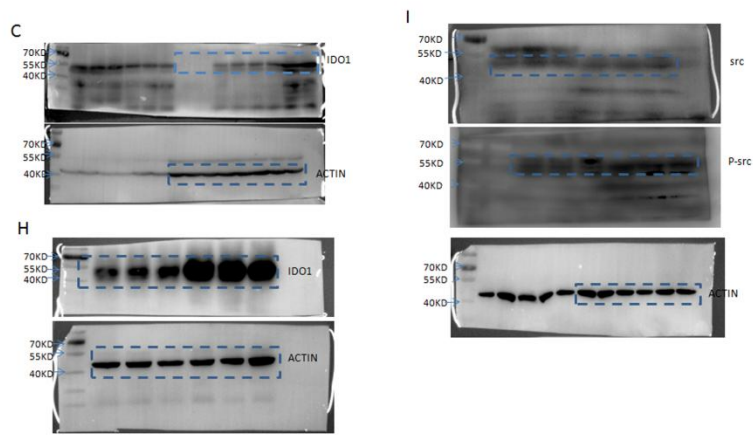

Figure S7

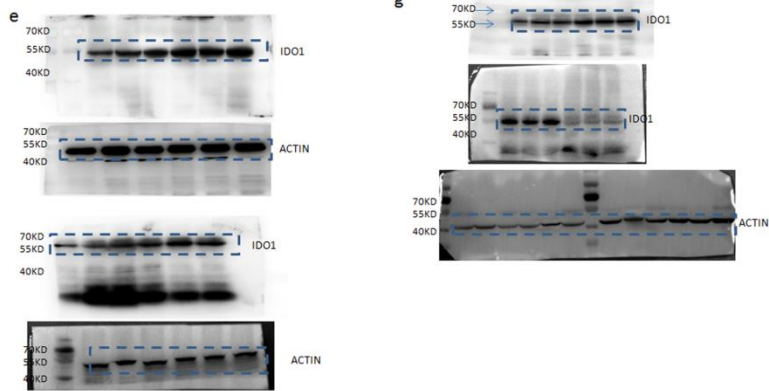

Figure S8

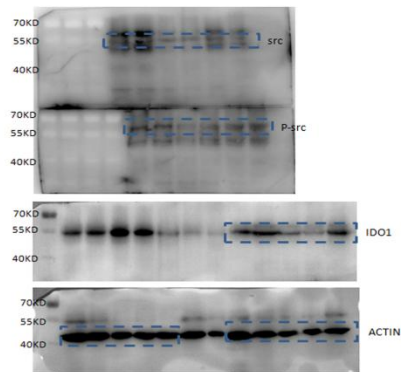

**Supplementary Fig. 11. The full western blot in which the portions of blots and gels have been presented in the main paper.**



**Supplementary Table 1.** The source of the reagents and primer sequences.

| REAGENT or RESOURCE                              | SOURCE        | IDENTIFIER                      |
|--------------------------------------------------|---------------|---------------------------------|
| Antibodies for immunoblotting and immunostaining |               |                                 |
| $\beta$ -Actin (C4) mouse                        | Santa Cruz    | Cat: sc-47778 RRID:AB_626632    |
| REG3a (NP_002571.1) human                        | Abcam         | Cat:ab95316 RRID:AB_10674667    |
| REG3a (3x1R-7) mouse                             | Santa Cruz    | Cat:sc-80319 RRID:AB_2178696    |
| Mucin2 (H-300) mouse/human                       | Santa Cruz    | Cat: sc-15334 RRID:AB_2146667   |
| Lysozyme (w-20) mouse/human                      | Santa Cruz    | Cat: sc-27956 RRID:AB_2138793   |
| LGR5 (c-16) mouse/human                          | Santa Cruz    | Cat: sc-68580 RRID:AB_2135160   |
| IDO1(E-1) mouse/human                            | Santa Cruz    | Cat: sc-376413 RRID:AB_11150511 |
| Src (Clone 327) mouse                            | Abcam         | Cat: ab16885 RRID:AB_443522     |
| Src (phospho Y418) mouse/human                   | Abcam         | Cat: ab4816 RRID:AB_304652      |
| FITC-Goat Anti-Rat IgG(H+L)                      | Proteintech   | Cat: SA00003-11                 |
| Alexa Fluor 488-Goat Anti-Mouse IgG(H+L)         | Proteintech   | Cat: SA00006-1                  |
| Alexa Fluor 594-Goat Anti-Rabbit IgG(H+L)        | Proteintech   | Cat: SA00006-4                  |
| Alexa Fluor 488-Goat Anti-Rabbit IgG(H+L)        | Proteintech   | Cat: SA00006-2                  |
| Antibodies for flow cytometry                    |               |                                 |
| PerCP/Cy5.5-CD45 (30-F11) mouse                  | Biolegend     | Cat:103132 RRID:AB_893340       |
| BV421-CD4 (GK1.5) mouse                          | Biolegend     | Cat:100438 RRID:AB_11203718     |
| FITC-CD3 (17A2) mouse                            | eBioscience   | Cat:11-0032-82 RRID:AB_2572431  |
| FITC-CD19 (eBio1d3) mouse                        | Biolegend     | Cat:115505 RRID:AB_313640       |
| FITC-Gr1 (RB6-8C5) mouse                         | eBioscience   | Cat:11-5931-85 RRID:AB_465315   |
| PE-IL22 (Poly5164) mouse                         | Biolegend     | Cat:516404 RRID:AB_2124255      |
| APC-IL17 (eBio17B7) mouse                        | eBioscience   | Cat:11-7177-81 RRID:AB_763581   |
| FITC-F4/80 (BM8) mouse                           | Biolegend     | Cat:123108 RRID:AB_893502       |
| APC-ROR $\gamma$ T (B2D) mouse                   | eBioscience   | Cat:17-6981-82 RRID:AB_2573254  |
| APC-CD11c (N418) mouse                           | Biolegend     | Cat:117310 RRID:AB_313779       |
| PE-CD103 (2E7) mouse                             | Biolegend     | Cat:121405 RRID:AB_535948       |
| PerCP/Cy5.5-CD11b (M1/70) mouse/human            | Biolegend     | Cat:101227 RRID:AB_893233       |
| PE/Cy7-NKp46 (29A1.4) mouse                      | eBioscience   | Cat:25-3351-80 RRID:AB_2573441  |
| PE-Ly6G (1A8) mouse                              | BD Bioscience | Cat:551461 RRID:AB_394208       |
| FITC-Ly6C (AL-21) mouse                          | BD Bioscience | Cat:553104 RRID:AB_394628       |
| Alexa Fluor 700-CD45 (30-F11)                    | Biolegend     | Cat: 103128 RRID:AB_493715      |
| 7-AAD                                            | Biolegend     | Cat. No. 34321X                 |
| Neutralizing antibody                            |               |                                 |

|                                   |           |                                  |
|-----------------------------------|-----------|----------------------------------|
| IL-22                             | Peprotech | Cat:500-P223 RRID:AB_1268324     |
| Primers for Real-time PCR         |           |                                  |
| Murine GAPDH-Fs                   | BGI       | 5'-TCAACGGCACAGTCAAGG-3'         |
| Murine GAPDH-Rs                   | BGI       | 5'-TACTCAGCACCCGGCCTCA-3'        |
| Murine MUC2                       | BGI       | 5'-ATGCCACCTCCTCAAAGAC-3'        |
| Murine MUC2                       | BGI       | 5'-GTAGTTTCCGTTGGAACAGTGAA-3'    |
| Murine REG3a-Fs                   | BGI       | 5'-CAAGGCTTATCGCTCCCACT-3'       |
| Murine REG3a-Rs                   | BGI       | 5'-ACGAGATGTCCTGAGGGTCT-3'       |
| Human REG3a-Fs                    | BGI       | 5'-CATTGGTAACAGCTACTCATACGTCT-3' |
| Human REG3a-Rs                    | BGI       | 5'-CCTCAGAAATGCTGTGCTTCTCGAC-3'  |
| Murine IFN $\gamma$ -Fs           | BGI       | 5'-AACGCTACACACTGCATCTTGG-3'     |
| Murine IFN $\gamma$ -Rs           | BGI       | 5'-GACTTCAAAGAGTCTGAGG-3'        |
| Murine TNFa-Fs                    | BGI       | 5'-GGTCTGGGCCATAGAAGTGA-3'       |
| Murine TNFa-Rs                    | BGI       | 5'-CAGCCTCTTCTCATTCTGC-3'        |
| Murine IL-6-Fs                    | BGI       | 5'-TCTGAAGGACTCTGGCTTGG-3'       |
| Murine IL-6-Rs                    | BGI       | 5'-GATGGATGCTACCAAAGTGA-3'       |
| Murine IL-1 $\beta$ -Fs           | BGI       | 5'-GTGTCTTCCCGTGGACCTT-3'        |
| Murine IL-1 $\beta$ -Rs           | BGI       | 5'-AATGGGAACGTACACACCA-3'        |
| Murine IL-22-Fs                   | BGI       | 5'-GCTCAGCTCCTGTCACATCA-3'       |
| Murine IL-22-Rs                   | BGI       | 5'-CAGACGCAAGCATTTCTCAG-3'       |
| Murine GM-CSF-Fs                  | BGI       | 5'-GCATGTAGAGGCCATCAAAGA-3'      |
| Murine GM-CSF-Rs                  | BGI       | 5'-CGGGTCTGCACACATGTTA-3'        |
| Murine IDO1-Fs                    | BGI       | 5'-CGGACTGAGAGGACACAGGTTAC-3'    |
| Murine IDO1-Rs                    | BGI       | 5'-ACACATACGCCATGGTGATGTAC-3'    |
| Murine Clca3-Fs                   | BGI       | 5'- AAGCAGCTGTGCTTCAGCAG -3'     |
| Murine Clca3-Rs                   | BGI       | 5'- CAGATTGGACTTATCCACAG -3'     |
| Murine Retnlb-Fs                  | BGI       | 5'- AAGCCTACACTGTGTTTCTTTT -3'   |
| Murine Retnlb-Rs                  | BGI       | 5'- GCTTCCTTGATCCTTTGATCCAC -3'  |
| Murine Tff2 -Fs                   | BGI       | 5'- CTTGGTGTTCACCCACTT -3'       |
| Murine Tff2 -Rs                   | BGI       | 5'- GGAAAAGCAGCAGTTTCGAC -3'     |
| Murine Cdkn2d -Fs                 | BGI       | 5'-CGGTATCCACTATGCTTCTGGAA -3'   |
| Murine Cdkn2d -Rs                 | BGI       | 5'-CCGCTGCGCCACTCA -3'           |
| Murine Cadkn1a -Fs                | BGI       | 5'-GTGGCCTTGTGCTGTCT-3'          |
| Murine Cadkn1a -Rs                | BGI       | 5'-TTTTCTCTTGCAGAAGACCAATC -3'   |
| Primers for detection of bacteria |           |                                  |
| Total Lactobacillus-Fs            | BGI       | 5'-TGGATGCCTTGGCACTAGGA -3'      |

|                                          |     |                                                       |
|------------------------------------------|-----|-------------------------------------------------------|
| Total Lactobacillus-Rs                   | BGI | 5'-AAATCTCCGGATCAAAGCTTACTTAT -3'                     |
| L. acidophilus-Fs                        | BGI | 5'-GAAAGAGCCCAAACCAAGTGATT -3'                        |
| L. acidophilus-Rs                        | BGI | 5'-CTTCCCAGATAATTCAACTATCGCTTA -3'                    |
| L.Reuteri-Fs                             | BGI | 5'-ACCGAGAACACCGCGTTATTT -3'                          |
| L.Reuteri-Rs                             | BGI | 5'-CATAACTTAACCTAAACAATCAAAGATTGTCT -3'               |
| L.Johnsoni-Fs                            | BGI | 5'-TCTTCCAATTTTTTCGGCAGT -3'                          |
| L.Johnsoni-Rs                            | BGI | 5'-CAGTGGGAGCTACAGAAGCA -3'                           |
| L.Plantorum-Fs                           | BGI | 5'-CTCTGGTATTGATTGGTGCTTGCAT -3'                      |
| L.Plantorum-Rs                           | BGI | 5'-GTTCCGCACTCACTCAAATGTAAA -3'                       |
| L.Murinus-Fs                             | BGI | 5'-AGCTAGTTGGTGGGGTAAAG -3'                           |
| L.Murinus-Rs                             | BGI | 5'-TAGGATTGTCAAAAGATGTC -3'                           |
| L.NK1-Fs                                 | BGI | 5'-CATCCAGTGCAAACCTAAGAG -3'                          |
| L.NK1-Rs                                 | BGI | 5'-GATCCGCTTGCCCTTCGCA -3'                            |
| L.NK2-Fs                                 | BGI | 5'-AGCTAGTTGGTGAGGTAAAG -3'                           |
| L.NK2-Rs                                 | BGI | 5'-TAGGATTGTCAGAAGATGTC -3'                           |
| Bacteroides Phylum-Fs                    | BGI | 5'-GAGAGGAAGGTCCCCAC -3'                              |
| Bacteroides Phylum-Rs                    | BGI | 5'-CGCTACTTGGCTGGTTCAG -3'                            |
| Firmicutes Phylum-Fs                     | BGI | 5'-GCTGCTAATACCGCATGATATGTC -3'                       |
| Firmicutes Phylum-Rs                     | BGI | 5'-CAGACGCGAGTCCATCTCAGA -3'                          |
| Primers for deletion of OCT              |     |                                                       |
| Left-Fs                                  | BGI | 5'-<br>ATGGCAATCGTTTCAGCAGTGCAGATTATTAAG<br>AC-3'     |
| Left-Rs                                  | BGI | 5'-<br>CAATTTTATTAAAGTTCATCAAGTACTATAATAG<br>GC-3'    |
| Cat-Fs                                   | BGI | 5'-<br>GCCTATTATAGTACTTGATGAACTTAATAAAAT<br>TG-3'     |
| Cat-Rs                                   | BGI | 5'-<br>CATGGCAAATGCCTCCTAATTATAAAAGCCAGTC<br>ATTAG-3' |
| Right-Fs                                 | BGI | 5'-<br>CTAATGACTGGCTTTTATAATTAGGAGGCATTTG<br>CCATG-3' |
| Right-Rs                                 | BGI | 5'-<br>CGAATTACGAATTTTTCTTAGTTATCACGAATAA<br>C-3'     |
| 36e-Fs                                   | BGI | 5'-<br>GTTATTCGTGATAACTAAGAAAAATTCGTAATTC<br>G-3'     |
| 36e-R                                    | BGI | 5'-<br>GTCTTAATAATCTCGCACTGCTGAAACGATTGCC<br>AT-3'    |
| Primers for analysis of deletion targets |     |                                                       |
| OCT-Fs                                   | BGI | 5'-ATGGCTTTTAATTTACGTA-3'                             |
| OCT-Rs                                   | BGI | 5'-TTAGTTTTGTTACCCAAAGT-3'                            |

|                                                                 |                   |                              |
|-----------------------------------------------------------------|-------------------|------------------------------|
| OCT-up                                                          | BGI               | 5'-CTTATTGACTTTGGCTTG-3'     |
| OCT-dw                                                          | BGI               | 5'-CTGTCCAATATGGGAATG-3'     |
| Primers for generation and identification of Human REG3atg mice |                   |                              |
| M13F                                                            | BGI               | 5'-GCCAGGGTTTTCCCAGTCACGA-3' |
| HD5-REG3A-tR                                                    | BGI               | 5'-GTAGGGTATGATGTGACGTTTG-3' |
| HD5-tR                                                          | BGI               | 5'-CAGCATGGTGGTACATGCCT-3'   |
| CDS-tF                                                          | BGI               | 5'-GGCAACATATGCCCATATGC-3'   |
| REG3A -tF3                                                      | BGI               | 5'-GAGCCCAATGGAGAAGGTTGG-3'  |
| REG3A -tR3                                                      | BGI               | 5'-GTCCTTCCGAGTGAGAGACAC-3'  |
| Probe                                                           |                   |                              |
| 16S rRNA (Eub338)                                               | PNA BIO           | Cy3-GCTGCCTCCCGTAGGAGT       |
| Lactobacillus 16S rRNA (Lac663)                                 | PNA BIO           | FAM-O-ACATGGAGTTCCACT        |
| Other reagents                                                  |                   |                              |
| REG3 $\alpha$ /Ad                                               | ABM               | Cat: 176974A                 |
| LPS ELISA KIT                                                   | Elabscience       | Cat: E-EL-0025C              |
| Mouse Ornithine ELISA KIT                                       | JiangSu Meibiao   | Cat: MB-5610A                |
| Mouse KYN ELISA KIT                                             | ImmuSmol          | Cat: BA-E-2200               |
| FITC-dextran (40,000kD)                                         | Sigma             | Cat: 53379                   |
| AB-PAS staining kits                                            | Leagene           | Cat: DG0007                  |
| Ampicillin                                                      | Sigma             | Cat: BP021                   |
| Vancomycine                                                     | Sigma             | Cat: V2002                   |
| Neomycin sulfate                                                | Sigma             | Cat: N6386                   |
| Metronidazole                                                   | Sigma             | Cat: M3761                   |
| L-Ornithine                                                     | Sigma             | Cat: O2375                   |
| L-Arginine                                                      | Sigma             | Cat: W381918                 |
| Standard kynurenine                                             | meilunbio         | Cat: MB5637                  |
| L-kyn sulfate                                                   | Sigma             | Cat: K3750                   |
| Eflornithine (DFMO)                                             | MCE               | Cat: HY-B0744B               |
| PP2                                                             | MCE               | Cat: HY-13805                |
| rIL-23                                                          | Gibco             | Cat: PHC9324                 |
| High-fat diet                                                   | Research Diets    | Cat: D12492                  |
| Rogosa SL selective medium                                      | Sigma             | Cat: R1148                   |
| MRS                                                             | 3M US             | Cat: BP0275500               |
| Trizol                                                          | Life Technologies | Cat: 15596026                |
| QIAquick PCR Purification Kit                                   | Qiagen            | Cat:28104                    |
| QuantiTect SYBR Green PCR Master Mix                            | Qiagen            | Cat:208052                   |

|                                   |                   |                 |
|-----------------------------------|-------------------|-----------------|
| FBS                               | Gibco             | Cat:10099141    |
| Collagenase IV                    | Sigma             | Cat: C5138      |
| Dnase I                           | Solarbio          | Cat: D8071      |
| DMEM                              | Gibco             | Cat:11965118    |
| HBSS                              | Gibco             | Cat:14170161    |
| Pecoll                            | Solarbio          | Cat: P8370      |
| Cell stimulation cocktail         | ebioscience       | Cat: 00-4975-03 |
| Foxp3 fix/perm buffer             | Biolegend         | Cat: 421403     |
| PMA                               | Sigma             | Cat: 79346      |
| GolgiStop                         | BD Biosciences    | Cat: 554724     |
| Permeabilization Buffer           | eBioscience       | Cat: 00-8333-56 |
| Alexa Fluor™ 488 Tyramide Reagent | Life Technologies | Cat: T20948     |
| Ki67antibody                      | Elabscience       | Cat: E-AB-31869 |
